# Supplementary material for: Metal–organic framework tethering pH- and thermo-responsive polymer for ON–OFF controlled release of guest molecules
Source: Royal Society of Chemistry journal article supplement (doi:10.1039/c9ce01731c), 2019-12-23
Supplement: c9ce01731c1.pdf [file c9ce01731c1.pdf]

*Electronic Supplementary Information for*

# Metal-Organic Framework Tethering pH- and Thermo-Responsive Polymer for ON-OFF Controlled Release of the Guest Molecules

Shunjiro Nagata,<sup>a</sup> Kenta Kokado,<sup>\*abc</sup> and Kazuki Sada<sup>\*abc</sup>

<sup>a</sup>Graduate School of Chemical Sciences and Engineering, Hokkaido University, Kita10 Nishi8, Kita-ku, Sapporo, Hokkaido, 060-0810, JAPAN.

<sup>b</sup>Faculty of Science, Hokkaido University, Kita10 Nishi8, Kita-ku, Sapporo, Hokkaido, 060-0810, JAPAN.

<sup>c</sup>JST-PRESTO.

## Contents

|                                                                                               |   |
|-----------------------------------------------------------------------------------------------|---|
| <b>Fig. S1</b> FT-IR spectra of the polymer and MOF crystals.                                 | 2 |
| <b>Fig. S2</b> Transmittance change of P(NIPAM-AA)-NHS aqueous solution.                      | 3 |
| <b>Fig. S3</b> XRD patterns of MOF crystals.                                                  | 4 |
| <b>Fig. S4</b> <sup>1</sup> H NMR spectra of the polymer and MOF crystals after digestion.    | 5 |
| <b>Fig. S5</b> XRD patterns of MOF crystals after digestion.                                  | 6 |
| <b>Fig. S6</b> Release of guest molecule from unmodified and modified MOF crystals.           | 7 |
| <b>Fig. S7</b> Release of guest molecule from MOF crystals with different modification ratio. | 8 |
| <b>Fig. S8</b> Release of guest molecule from MOF crystal at different temperatures.          | 9 |

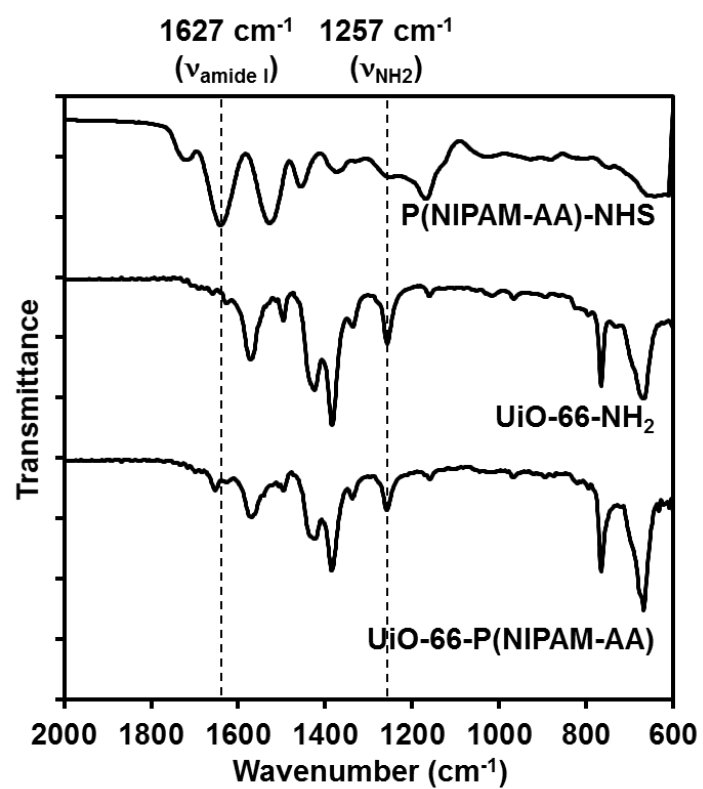

**Fig. S1** FT-IR spectra of P(NIPAM-AA)-NHS, UiO-66-NH<sub>2</sub>, and UiO-66P(NIPAM-AA).

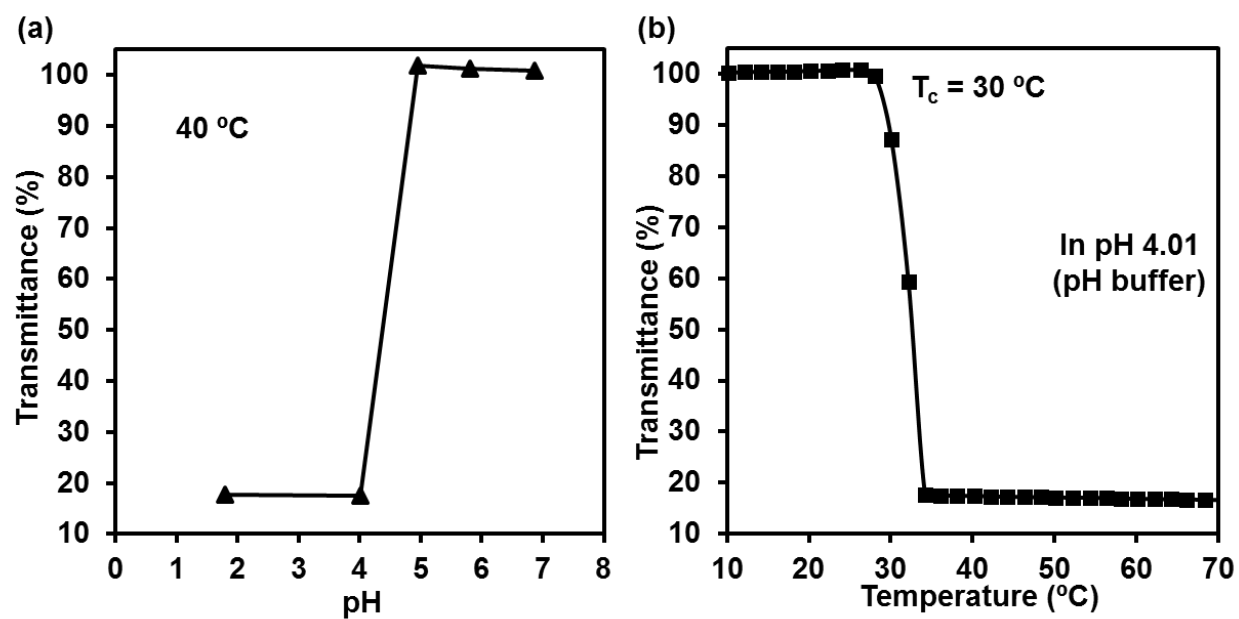

**Fig. S2** Transmittance change of P(NIPAM-AA)-NHS aqueous solution (a) at various pH and (b) at various temperature (15 g/L).

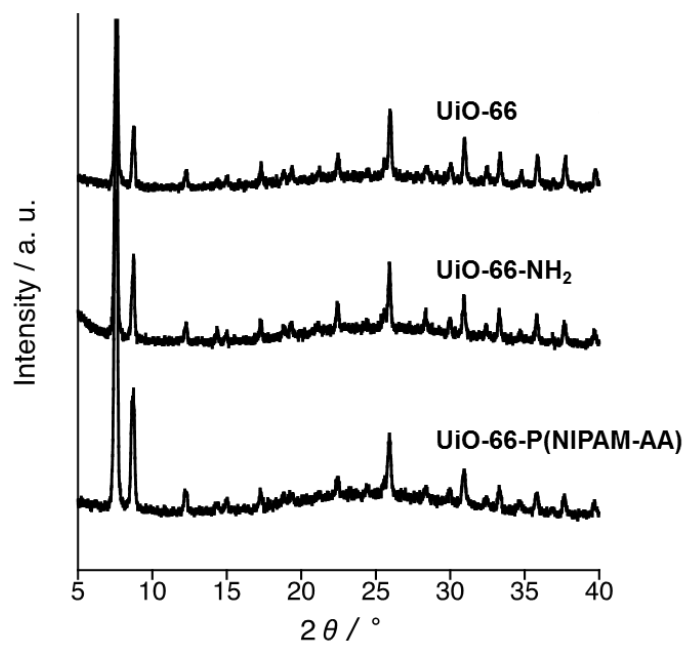

**Fig. S3** Powder X-ray diffraction patterns of UiO-66, UiO-66-NH<sub>2</sub>, and UiO-66-P(NIPAM-AA).

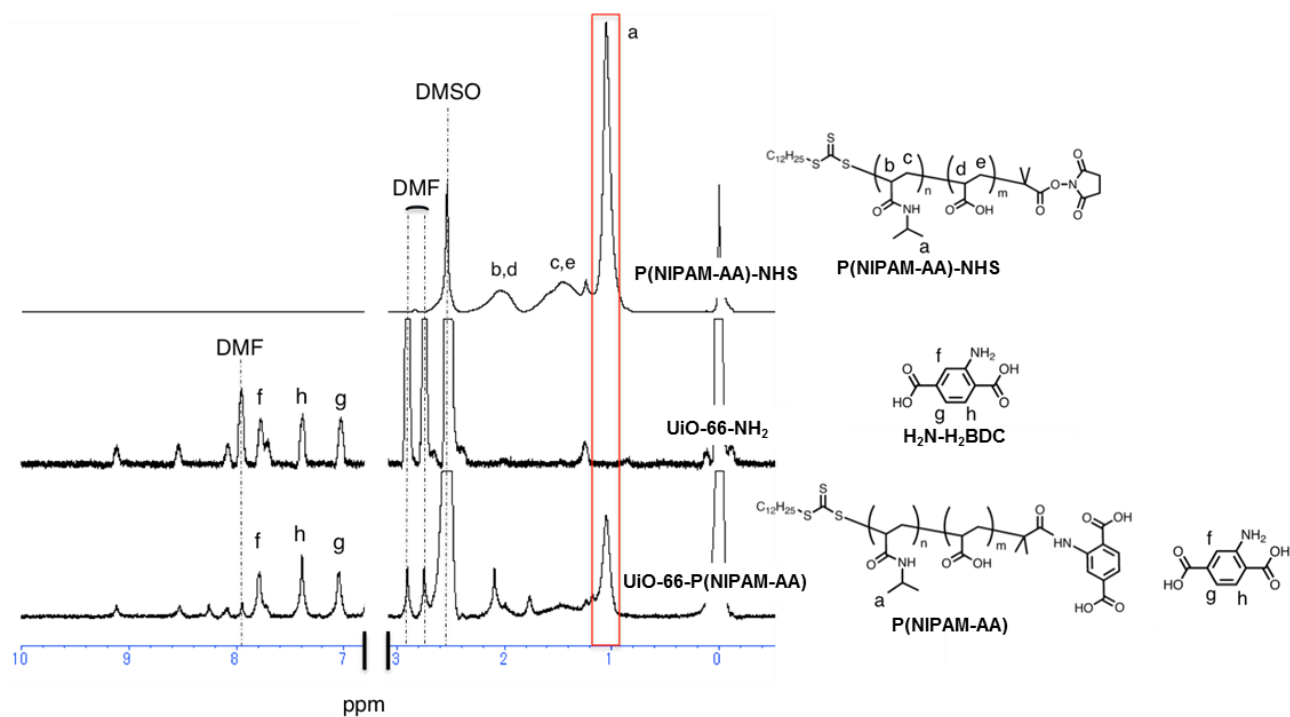

**Fig. S4**  $^1\text{H}$  NMR spectra of  $\text{P(NIPAM-AA)-NHS}$ ,  $\text{UiO-66-NH}_2$ , and  $\text{UiO-66-P(NIPAM-AA)}$  after digestion by HF aq. in  $\text{DMSO}-d_6$  (1.4 mM for HF).

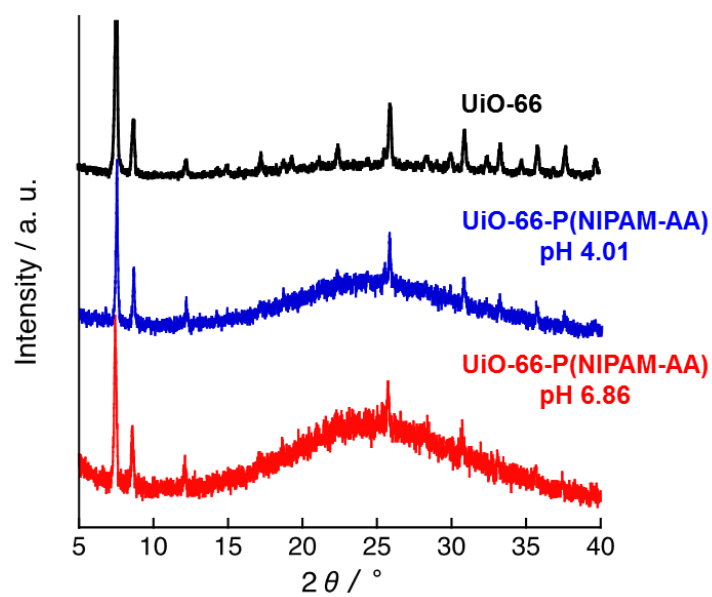

**Fig. S5** Powder X-ray diffraction patterns of UiO-66, and UiO-66-P(NIPAM-AA) after one day immersion in pH buffers (6.86 and 4.01).

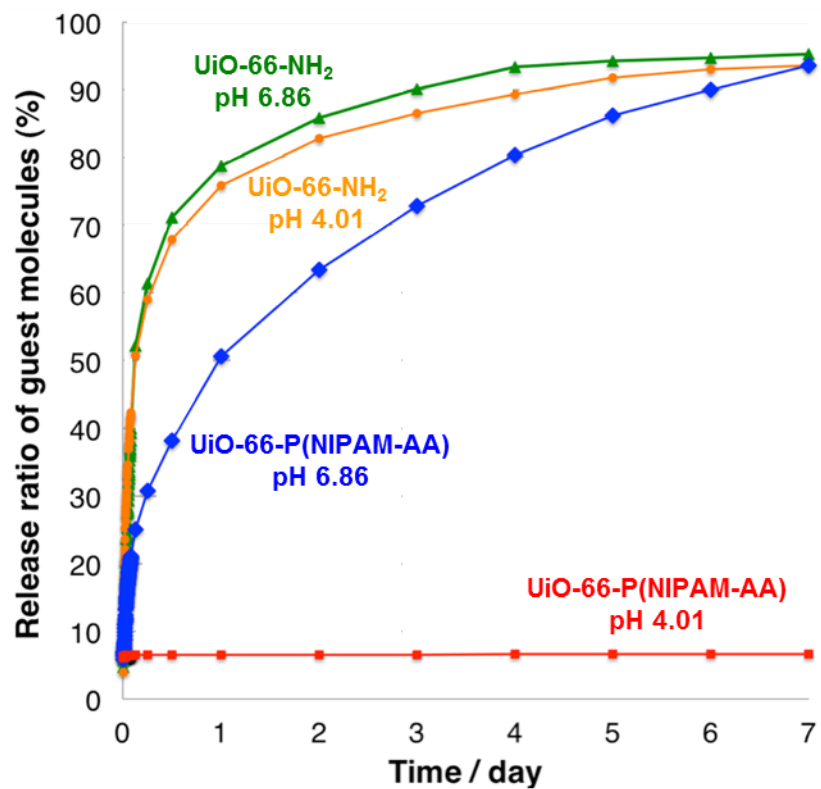

**Fig. S6** Release behaviour of guest molecule (procainamide) from UiO-66-NH<sub>2</sub> and UiO-66-P(NIPAM-AA) in pH buffers (6.86 and 4.01) at 40°C for seven days.

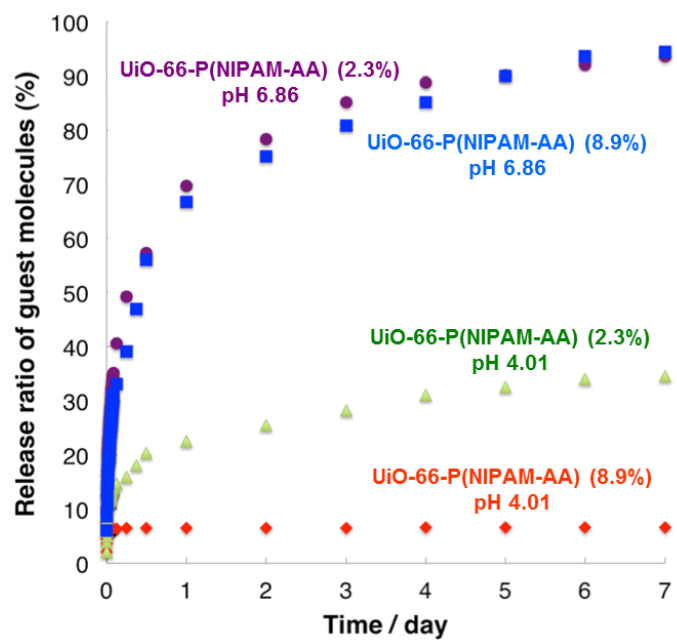

**Fig. S7** Release behaviour of guest molecule (procainamide) from UiO-66-P(NIPAM-AA) (2.3%) and UiO-66-P(NIPAM-AA) (8.9%) in pH buffers (6.86 and 4.01) at 40°C for seven days.



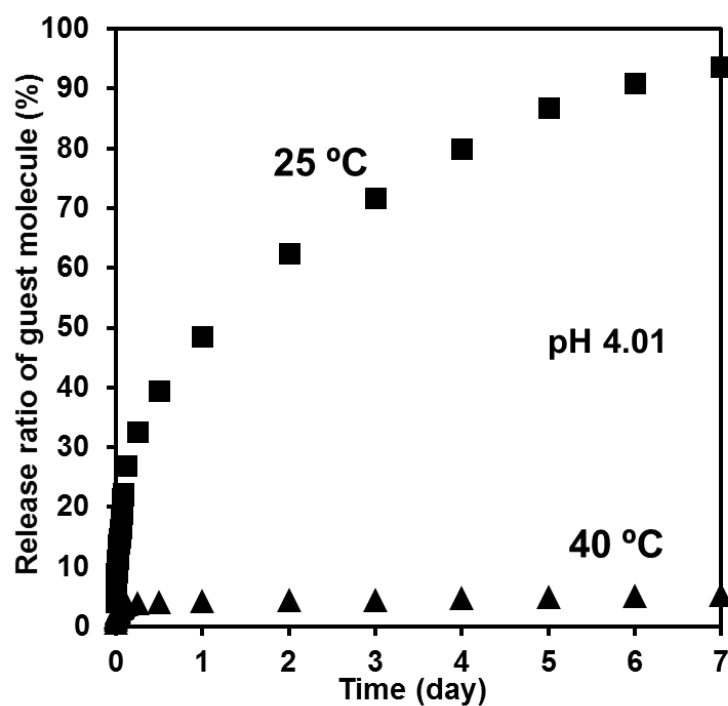

**Fig. S8** Release behaviour of guest molecule (procainamide) from UiO-66-P(NIPAM-AA) at 25°C and 40°C in pH buffer (4.01) for seven days.
